# Supplementary material
Source: HighWire-hosted journal article supplement (https://cmaj.ca/highwire/filestream/58092/field_highwire_adjunct_files/1/hyp-egeland-2-at.pdf)
Supplement: hyp-egeland-2-at.pdf [file hyp-egeland-2-at.pdf]

**Appendix 2** (as submitted by the authors): **Excluding Alcohol Consumers. Weighted estimated risk for fasting glycemia  $\geq 5.6$  mmol/L<sup>1</sup> and type2 diabetes<sup>1</sup> by the hypertriglyceridemic-waist phenotype among Canadian Inuit.**

| Waist(cm)/<br>triglyceride<br>(mmol/L) | Fasting glycemia $\geq 5.6$ mmol/L <sup>1</sup> |              |                           |                                      | Diabetes <sup>2</sup> |             |                           |                                      |
|----------------------------------------|-------------------------------------------------|--------------|---------------------------|--------------------------------------|-----------------------|-------------|---------------------------|--------------------------------------|
|                                        | No<br>N=527                                     | Yes<br>N=146 | Unadjusted<br>OR (95% CI) | Adjusted <sup>3</sup><br>OR (95% CI) | No<br>N=633           | Yes<br>N=45 | Unadjusted<br>OR (95% CI) | Adjusted <sup>3</sup><br>OR (95% CI) |
| Low W.C./<1.7                          | 244                                             | 28           | 1.0                       | 1.0                                  | 267                   | 6           | 1.0                       | 1.0                                  |
| Low W.C./ $\geq 1.7$                   | 37                                              | 8            | 1.3 (0.4 - 3.7)           | 1.1 (0.2-5.1)                        | 45                    | 1           | 0.3 (0.0-3.0)             | 0.3 (0.0-3.0)                        |
| High W.C./<1.7                         | 157                                             | 59           | 2.4 (1.2 - 4.9) *         | 1.4 (0.6-3.3)                        | 200                   | 19          | 3.3 (0.9-13.0)            | 3.3 (0.9-13.0)                       |
| High W.C./ $\geq 1.7$                  | 89                                              | 51           | 4.8 (2.3-10.1)***         | 3.5 (1.6-7.6) *                      | 121                   | 19          | 6.8 (1.6-27.9) *          | 6.8 (1.6-27.9) *                     |

<sup>1</sup>Or taking medication for diabetes.

<sup>2</sup>Probable 2 DM defined as fasting glucose  $\geq 7.0$  mmol/l or 2-hr 75 g OGTT  $\geq 11.1$  mmol/l or taking medications for diabetes.

<sup>3</sup>Model adjusted by gender, age(5 yrs increments), region, education, family history of diabetes, and lipid lowering medication usage.

\* P\_value<0.05 \*\* P\_value<0.001 \*\*\* P\_value<0.0001

---- Too few samples
